# Supplementary material for: Quasi-1D hyperbranched WO3 nanostructures for low-voltage photoelectrochemical water splitting
Source: Royal Society of Chemistry journal article supplement (doi:10.1039/c4ta06786j), 2015-01-01
Supplement: c4ta06786j1.pdf [file c4ta06786j1.pdf]

# Quasi-1D Hyperbranched WO<sub>3</sub> Nanostructures for Low Voltage Photoelectrochemical Water-Splitting

*Mehrdad Balandeh,<sup>1,2,†</sup> Alessandro Mezzetti,<sup>1,3,†</sup> Alessandra Tacca,<sup>4</sup> Silvia Leonardi,<sup>1</sup> Gianluigi Marra,<sup>4</sup> Giorgio Divitini,<sup>5</sup> Caterina Ducati,<sup>5</sup> Laura Meda,<sup>4</sup> Fabio Di Fonzo.<sup>1,‡</sup>*

<sup>1</sup> Center for Nano Science and Technology@PoliMI, Istituto Italiano di Tecnologia, Via Giovanni Pascoli 70/3, 20133 Milano, Italy

<sup>2</sup> Dipartimento di Energia, Politecnico di Milano, Piazza Leonardo da Vinci 32, 20133 Milano, Italy

<sup>3</sup> Dipartimento di Fisica, Politecnico di Milano, Piazza Leonardo da Vinci 32, 20133 Milano, Italy

<sup>4</sup> Eni S.p.A., Istituto ENI Donegani, Via Giacomo Fauser 4, 28100 Novara, Italy

<sup>5</sup> Department of Materials Science & Metallurgy, University of Cambridge, 27 Charles Babbage Road, CB3 0FS, Cambridge, United Kingdom

# SUPPORTING INFORMATION

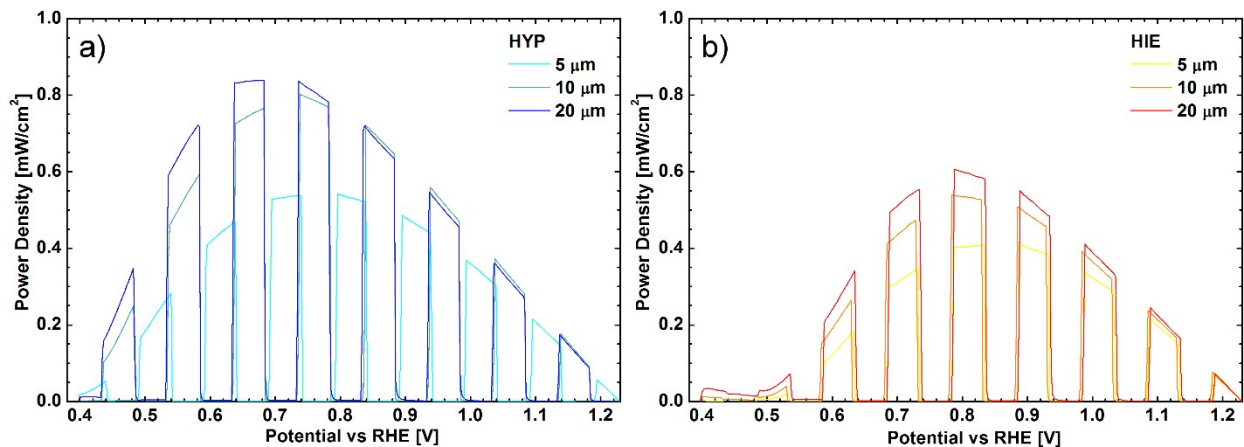

**Figure S1.** Power efficiency curves of the HYP (a) and HIE (b) samples as a function of thickness.

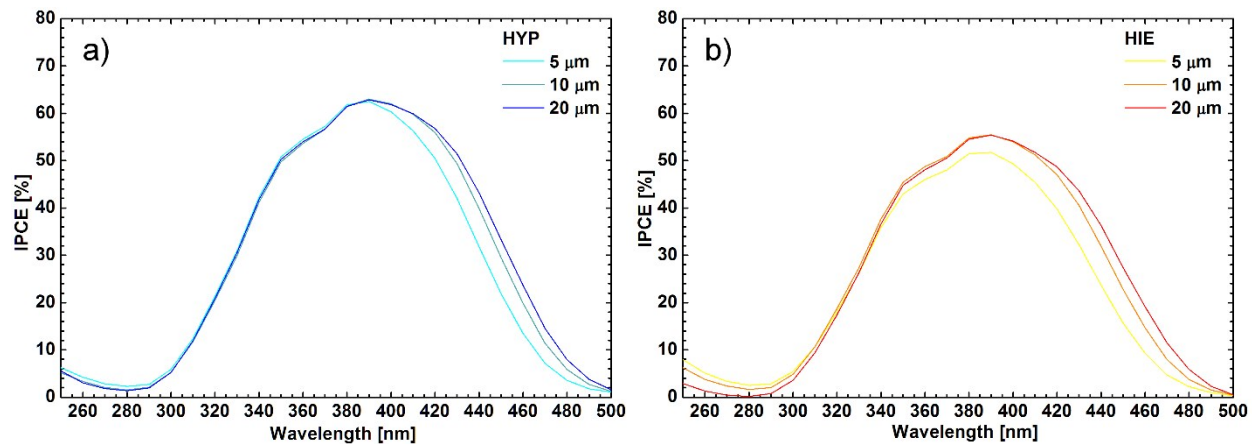

**Figure S2.** IPCE curves of the HYP (a) and HIE (b) samples as a function of thickness measured by shining light from the glass side and with an applied bias of 1 V vs RHE.

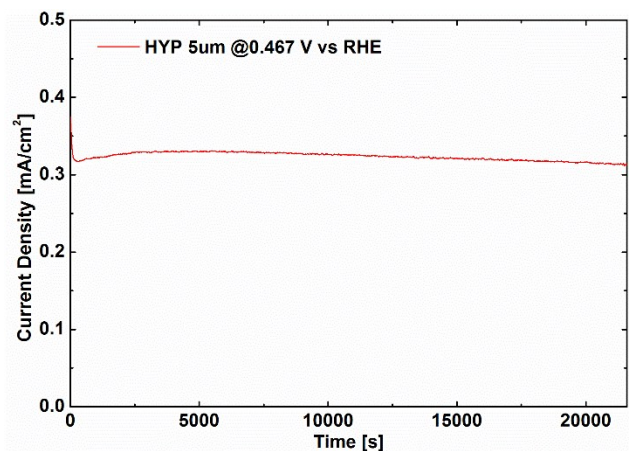

**Figure S3.** Chronoamperometry of the 5- $\mu\text{m}$ -thick HYP sample performed for 6 hours under standard AM 1.5G illumination with the sample immersed in an aqueous solution of 1 M sulfuric acid ( $\text{H}_2\text{SO}_4$ ) and with an applied bias of 0.467 V vs RHE.

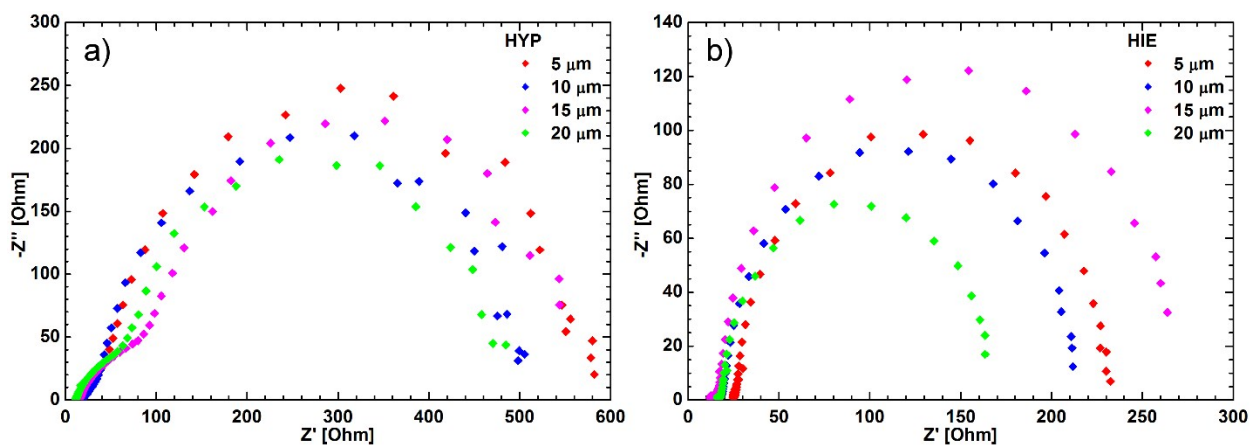

**Figure S4.** EIS curves as Nyquist plots of the HYP (a) and HIE (b) samples as a function of thickness measured with an applied bias of 0.7 V vs RHE.

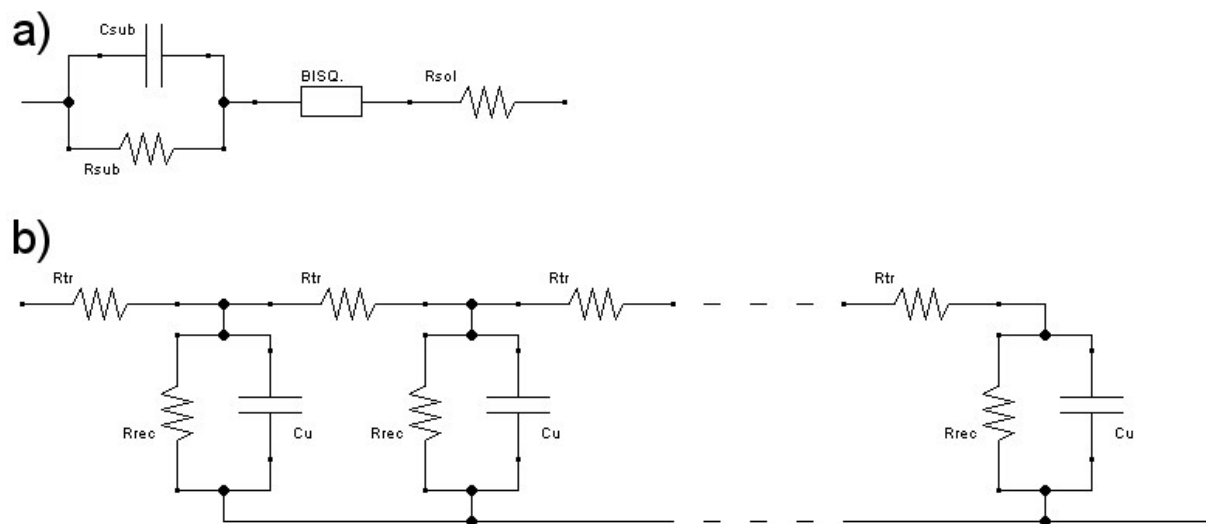

**Figure S5.** Equivalent circuit employed for the EIS data fitting (a), showing respectively the double layer at the TCO substrate/film interface ( $R_{sub}$  and  $C_{sub}$ ), the “Bisquert” transmission line element (BISQ.) and the resistance of the electrolytic solution ( $R_{sol}$ ). Exploded circuit for the “Bisquert” transmission line element (b), showing a repetition of the main circuit block made by the bulk transport resistance ( $R_{tr}$ ) and the double layer at the nanoparticles/electrolyte interface ( $R_{rec}$  and  $C_u$ ).
